# Supplementary material for: Obesity-Related Indices Are Associated with Longitudinal Changes in Lung Function: A Large Taiwanese Population Follow-Up Study
Source: MDPI journal article supplement (doi:10.3390/nu13114055), 2021-11-12
Supplement: s1 [file s1]

Supplementary Table S1. Determinants for FEV1/FVC in different lung function group using multivariable linear regression analysis

| Characteristics                | Normal (n = 6016)                              |          | Obstructive (n = 3043)                         |          |
|--------------------------------|------------------------------------------------|----------|------------------------------------------------|----------|
|                                | Multivariable                                  |          | Multivariable                                  |          |
|                                | Unstandardized coefficient $\beta$<br>(95% CI) | <i>p</i> | Unstandardized coefficient $\beta$<br>(95% CI) | <i>p</i> |
| BMI (per 1 kg/m <sup>2</sup> ) | 0.084 (0.034, 0.135)                           | 0.001    | 0.029 (-0.133, 0.190)                          | 0.728    |
| WHR (per 1%)                   | 0.052 (0.026, 0.079)                           | < 0.001  | -0.032 (-0.113, 0.048)                         | 0.434    |
| WHtR (per 1%)                  | 0.070 (0.041, 0.099)                           | < 0.001  | 0.014 (-0.078, 0.105)                          | 0.768    |
| LAP (per 1)                    | 0.008 (0.001, 0.014)                           | 0.015    | 0.004 (-0.017, 0.025)                          | 0.713    |
| BRI (per 1)                    | 0.186 (0.092, 0.280)                           | < 0.001  | 0.042 (-0.257, 0.340)                          | 0.874    |
| CI (per 0.1)                   | 0.267 (0.066, 0.469)                           | 0.009    | -0.030 (-0.645, 0.585)                         | 0.925    |
| BAI (per 1)                    | 0.102 (0.056, 0.148)                           | < 0.001  | 0.097 (-0.046, 0.241)                          | 0.184    |
| AVI (per 1)                    | 0.079 (0.023, 0.134)                           | 0.005    | 0.017 (-0.160, 0.194)                          | 0.849    |

Values expressed as unstandardized coefficient  $\beta$  and 95% confidence interval (CI).

Multivariable model: adjusted for age, sex, SBP, DBP and uric acid.

Supplementary Table S2. Determinants for  $\Delta$ FEV1/FVC in different lung function group using multivariable linear regression analysis

| Characteristics                | Normal (n = 6016)                           |          | Obstructive (n = 3043)                      |          |
|--------------------------------|---------------------------------------------|----------|---------------------------------------------|----------|
|                                | Multivariable                               |          | Multivariable                               |          |
|                                | Unstandardized coefficient $\beta$ (95% CI) | <i>p</i> | Unstandardized coefficient $\beta$ (95% CI) | <i>p</i> |
| BMI (per 1 kg/m <sup>2</sup> ) | -0.029 (-0.012, 0.053)                      | 0.486    | -0.083 (0.285, 0.119)                       | 0.420    |
| WHR (per 1%)                   | -0.049 (-0.093, -0.004)                     | 0.031    | 0.038 (-0.066, 0.142)                       | 0.473    |
| WHtR (per 1%)                  | -0.055 (-0.103, -0.007)                     | 0.024    | -0.041 (-0.156, 0.075)                      | 0.493    |
| LAP (per 1)                    | -0.006 (-0.017, 0.004)                      | 0.230    | -0.016 (-0.043, 0.010)                      | 0.235    |
| BRI (per 1)                    | -0.142 (-0.297, 0.012)                      | 0.071    | -0.124 (-0.501, 0.253)                      | 0.518    |
| CI (per 0.1)                   | -0.425 (-0.768, -0.082)                     | 0.015    | -0.006 (-0.809, 0.797)                      | 0.988    |
| BAI (per 1)                    | -0.072 (-0.149, 0.004)                      | 0.064    | -0.172 (-0.357, 0.013)                      | 0.068    |
| AVI (per 1)                    | -0.065 (-0.157, 0.026)                      | 0.160    | -0.063 (-0.286, 0.160)                      | 0.580    |

Values expressed as unstandardized coefficient  $\beta$  and 95% confidence interval (CI).

Multivariable model: adjusted for age, sex, SBP, DBP, total cholesterol and eGFR.

Supplementary Table S3. Determinants for FEV1/FVC in different gender group using multivariable linear regression analysis

| Characteristics                | Male (n = 1814)                                |          | Female (n = 7245)                              |          |
|--------------------------------|------------------------------------------------|----------|------------------------------------------------|----------|
|                                | Multivariable                                  |          | Multivariable                                  |          |
|                                | Unstandardized coefficient $\beta$<br>(95% CI) | <i>p</i> | Unstandardized coefficient $\beta$<br>(95% CI) | <i>p</i> |
| BMI (per 1 kg/m <sup>2</sup> ) | 0.423 (0.140, 0.705)                           | 0.003    | 0.271 (0.134, 0.408)                           | < 0.001  |
| WHR (per 1%)                   | 0.254 (0.085, 0.424)                           | 0.003    | 0.100 (0.032, 0.169)                           | 0.004    |
| WHtR (per 1%)                  | 0.325 (0.145, 0.505)                           | < 0.001  | 0.164 (0.087, 0.241)                           | < 0.001  |
| LAP (per 1)                    | 0.041 (0.010, 0.072)                           | 0.010    | 0.019 (0.001, 0.037)                           | 0.033    |
| BRI (per 1)                    | 0.988 (0.438, 1.538)                           | < 0.001  | 0.472 (0.220, 0.723)                           | < 0.001  |
| CI (per 0.1)                   | 2.004 (0.603, 3.405)                           | 0.005    | 0.512 (-0.005, 1.029)                          | 0.052    |
| BAI (per 1)                    | 0.362 (0.073, 0.651)                           | 0.014    | 0.242 (0.121, 0.362)                           | < 0.001  |
| AVI (per 1)                    | 0.505 (0.208, 0.803)                           | 0.001    | 0.240 (0.088, 0.392)                           | 0.002    |

Values expressed as unstandardized coefficient  $\beta$  and 95% confidence interval (CI).

Multivariable model: adjusted for age, sex, SBP, DBP and uric acid.

Supplementary Table S4. Determinants for  $\Delta$ FEV1/FVC in different gender using multivariable linear regression analysis

| Characteristics                | Male (n = 1814)                                |          | Female (n = 7245)                              |          |
|--------------------------------|------------------------------------------------|----------|------------------------------------------------|----------|
|                                | Multivariable                                  |          | Multivariable                                  |          |
|                                | Unstandardized coefficient $\beta$<br>(95% CI) | <i>p</i> | Unstandardized coefficient $\beta$<br>(95% CI) | <i>p</i> |
| BMI (per 1 kg/m <sup>2</sup> ) | -0.323 (-0.623, -0.025)                        | 0.034    | -0.273 (-0.416, -0.130)                        | < 0.001  |
| WHR (per 1%)                   | -0.274 (-0.456, -0.093)                        | 0.003    | -0.102 (-0.176, -0.027)                        | 0.007    |
| WHtR (per 1%)                  | -0.290 (-0.481, -0.100)                        | 0.003    | -0.174 (-0.256, -0.092)                        | < 0.001  |
| LAP (per 1)                    | -0.031 (-0.065, 0.003)                         | 0.071    | -0.028 (-0.047, -0.009)                        | 0.004    |
| BRI (per 1)                    | -0.900 (-1.483, -0.316)                        | 0.003    | -0.507 (-0.774, -0.241)                        | < 0.001  |
| CI (per 0.1)                   | -2.389 (-3.898, -0.881)                        | 0.002    | -0.658 (-1.225, -0.090)                        | 0.023    |
| BAI (per 1)                    | -0.252 (-0.561, 0.057)                         | 0.110    | -0.273 (-0.403, -0.143)                        | < 0.001  |
| AVI (per 1)                    | -0.480 (-0.796, -0.164)                        | 0.003    | -0.268 (-0.429, -0.108)                        | 0.001    |

Values expressed as unstandardized coefficient  $\beta$  and 95% confidence interval (CI).

Multivariable model: adjusted for age, sex, SBP, DBP, total cholesterol and eGFR.

Supplementary Table S5. Determinants for FEV1/FVC in different age group using multivariable linear regression analysis

| Characteristics                | Age $\geq$ 52 years (n = 4801)                 |          | Age < 52 years (n = 4258)                      |          |
|--------------------------------|------------------------------------------------|----------|------------------------------------------------|----------|
|                                | Multivariable                                  |          | Multivariable                                  |          |
|                                | Unstandardized coefficient $\beta$<br>(95% CI) | <i>p</i> | Unstandardized coefficient $\beta$<br>(95% CI) | <i>p</i> |
| BMI (per 1 kg/m <sup>2</sup> ) | 0.352 (0.177, 0.527)                           | < 0.001  | 0.239 (0.065, 0.413)                           | 0.007    |
| WHR (per 1%)                   | 0.064 (-0.021, 0.150)                          | 0.138    | 0.203 (0.108, 0.298)                           | < 0.001  |
| WHtR (per 1%)                  | 0.190 (0.094, 0.286)                           | < 0.001  | 0.199 (0.095, 0.303)                           | < 0.001  |
| LAP (per 1)                    | 0.018 (-0.002, 0.038)                          | 0.075    | 0.032 (0.008, 0.057)                           | 0.009    |
| BRI (per 1)                    | 0.567 (0.257, 0.876)                           | < 0.001  | 0.595 (0.255, 0.934)                           | 00.001   |
| CI (per 0.1)                   | 0.575 (0.068, 1.219)                           | 0.080    | 1.013 (0.274, 1.753)                           | 0.007    |
| BAI (per 1)                    | 0.355 (0.201, 0.508)                           | < 0.001  | 0.166 (0.005, 0.327)                           | 0.043    |
| AVI (per 1)                    | 0.315 (0.129, 0.500)                           | 0.001    | 0.292 (0.094, 0.490)                           | 0.004    |

Values expressed as unstandardized coefficient  $\beta$  and 95% confidence interval (CI).

Multivariable model: adjusted for age, sex, SBP, DBP and uric acid.

Supplementary Table S6. Determinants for  $\Delta$ FEV1/FVC in different age group using multivariable linear regression analysis

| Characteristics                | Age $\geq$ 52 years (n = 4801)                 |          | Age < 52 years (n = 4258)                      |          |
|--------------------------------|------------------------------------------------|----------|------------------------------------------------|----------|
|                                | Multivariable                                  |          | Multivariable                                  |          |
|                                | Unstandardized coefficient $\beta$<br>(95% CI) | <i>p</i> | Unstandardized coefficient $\beta$<br>(95% CI) | <i>p</i> |
| BMI (per 1 kg/m <sup>2</sup> ) | -0.315 (-0.495, 0.135)                         | 0.001    | -0.256 (-0.444, -0.069)                        | 0.007    |
| WHR (per 1%)                   | -0.070 (-0.160, 0.021)                         | 0.130    | -0.208 (-0.314, -0.103)                        | < 0.001  |
| WHtR (per 1%)                  | -0.192 (-0.292, -0.092)                        | < 0.001  | -0.207 (-0.321, -0.094)                        | < 0.001  |
| LAP (per 1)                    | -0.027 (-0.048, -0.006)                        | 0.011    | -0.033 (-0.060, -0.007)                        | 0.014    |
| BRI (per 1)                    | -0.582 (-0.903, -0.260)                        | < 0.001  | -0.615 (-0.984, -0.247)                        | 0.001    |
| CI (per 0.1)                   | -0.794 (-1.485, -0.103)                        | 0.024    | -1.115 (-1.943, -0.287)                        | 0.008    |
| BAI (per 1)                    | -0.356 (-0.518, -0.194)                        | < 0.001  | -0.193 (-0.370, -0.016)                        | 0.033    |
| AVI (per 1)                    | -0.337 (-0.530, -0.144)                        | 0.001    | -0.307 (-0.522, -0.093)                        | 0.005    |

Values expressed as unstandardized coefficient  $\beta$  and 95% confidence interval (CI).

Multivariable model: adjusted for age, sex, SBP, DBP, total cholesterol and eGFR.
